# Supplementary figures and images for: Comprehensive Genomic and Transcriptomic Analysis of Three Synchronous Primary Tumours and a Recurrence from a Head and Neck Cancer Patient
Source: MDPI journal article supplement (doi:10.3390/ijms22147583), 2021-07-15

CD163/CD68 mIHC

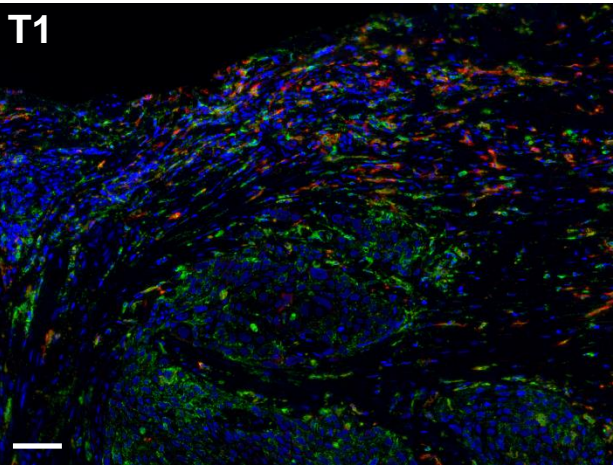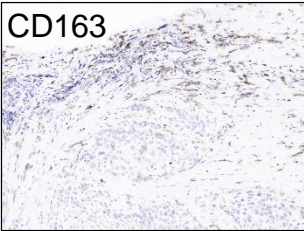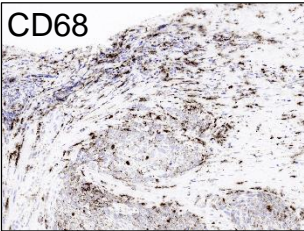

CD163/CD68 mIHC

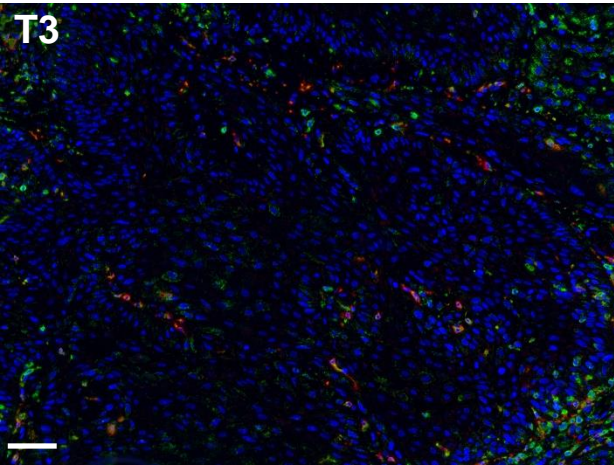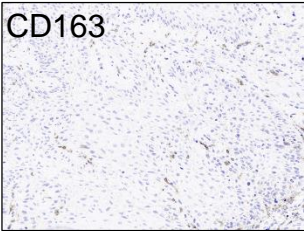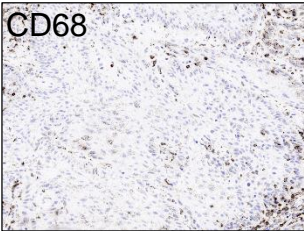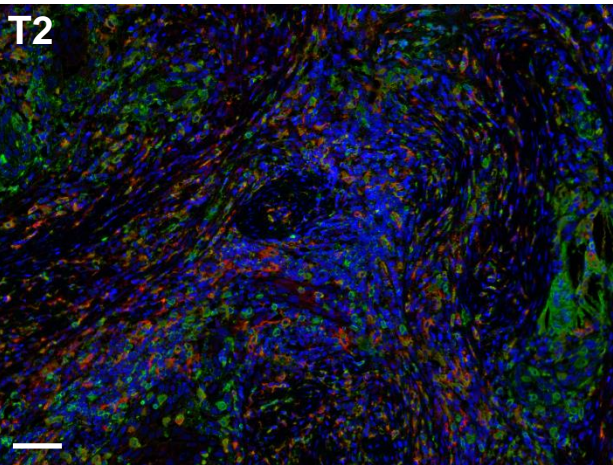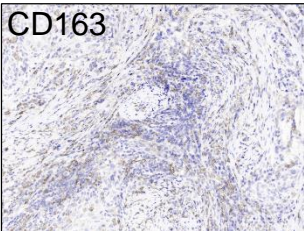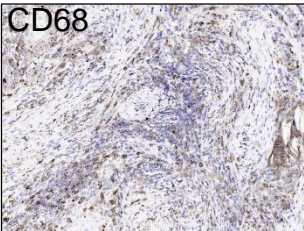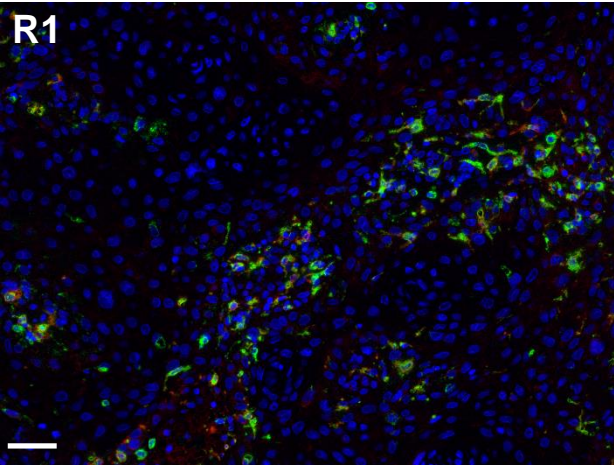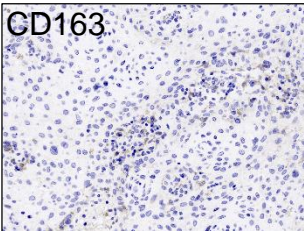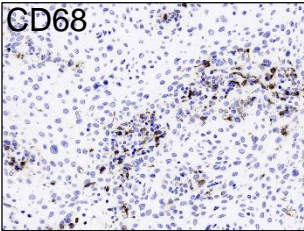

Supplement: s1 [file s1]

CD3 IHC

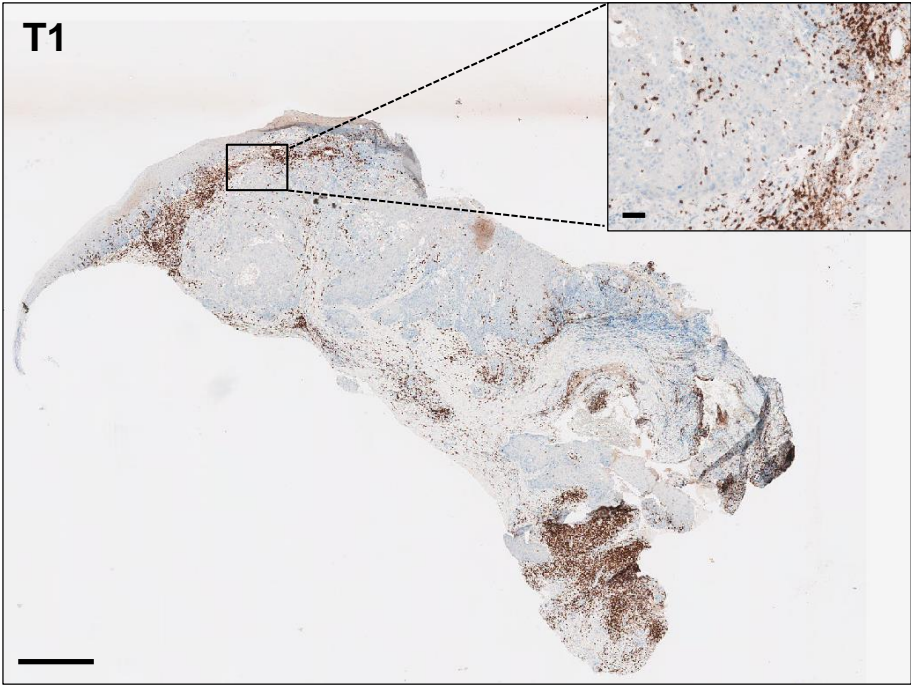

CD3 IHC

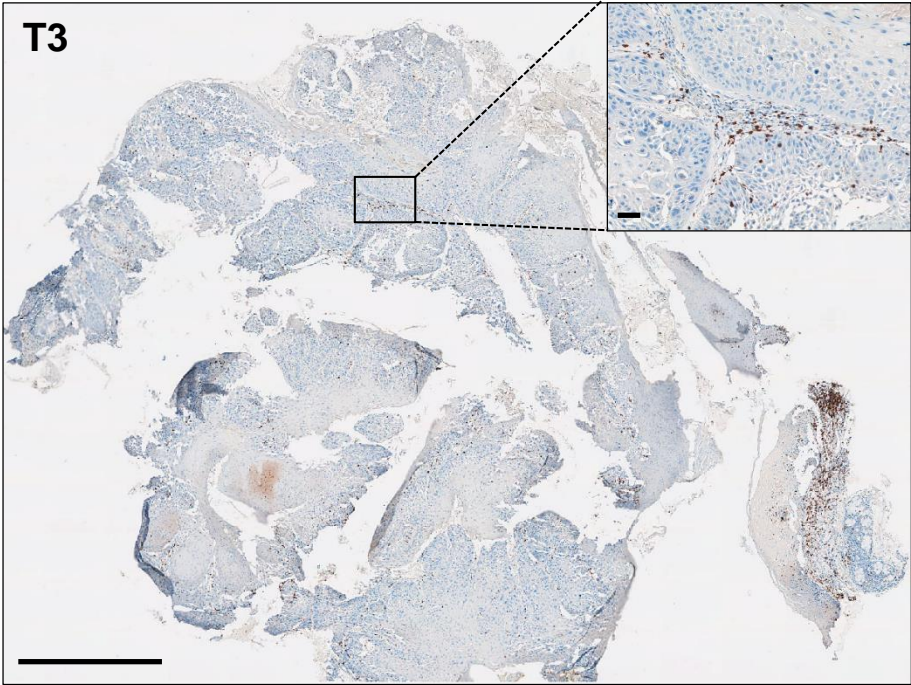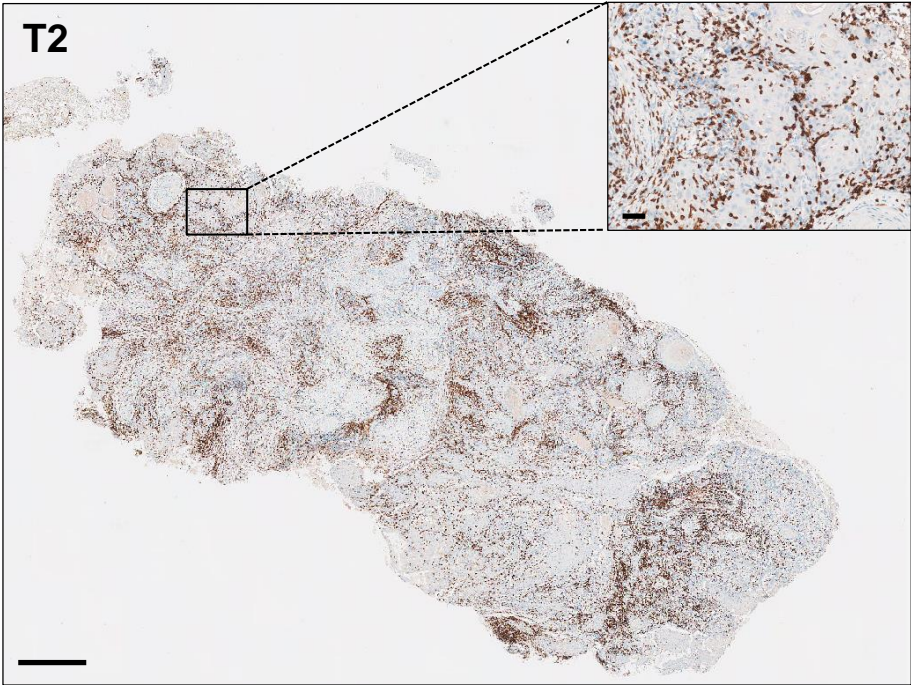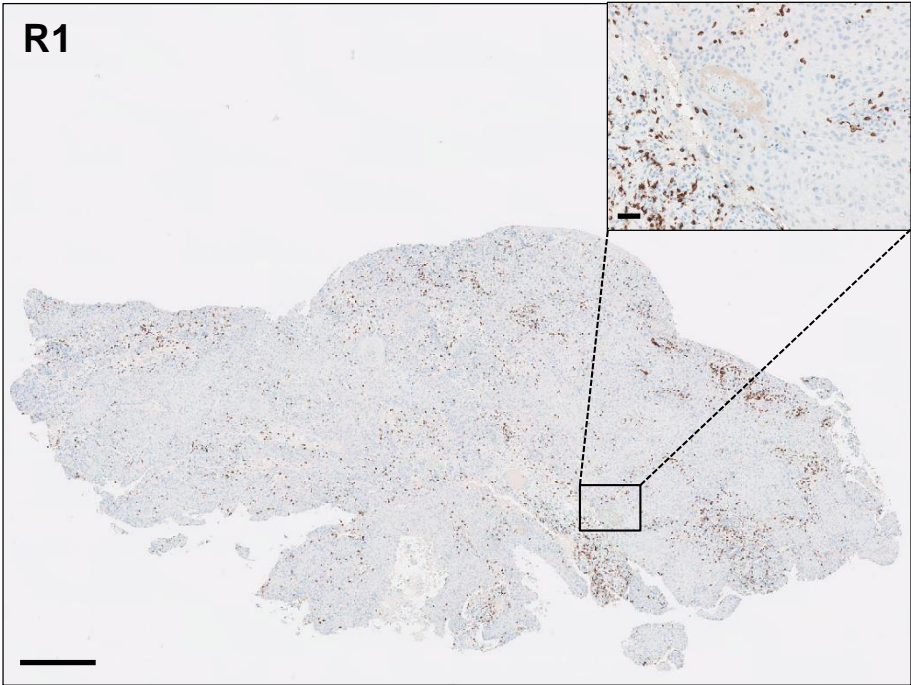

Supplement: s1 [file s1]

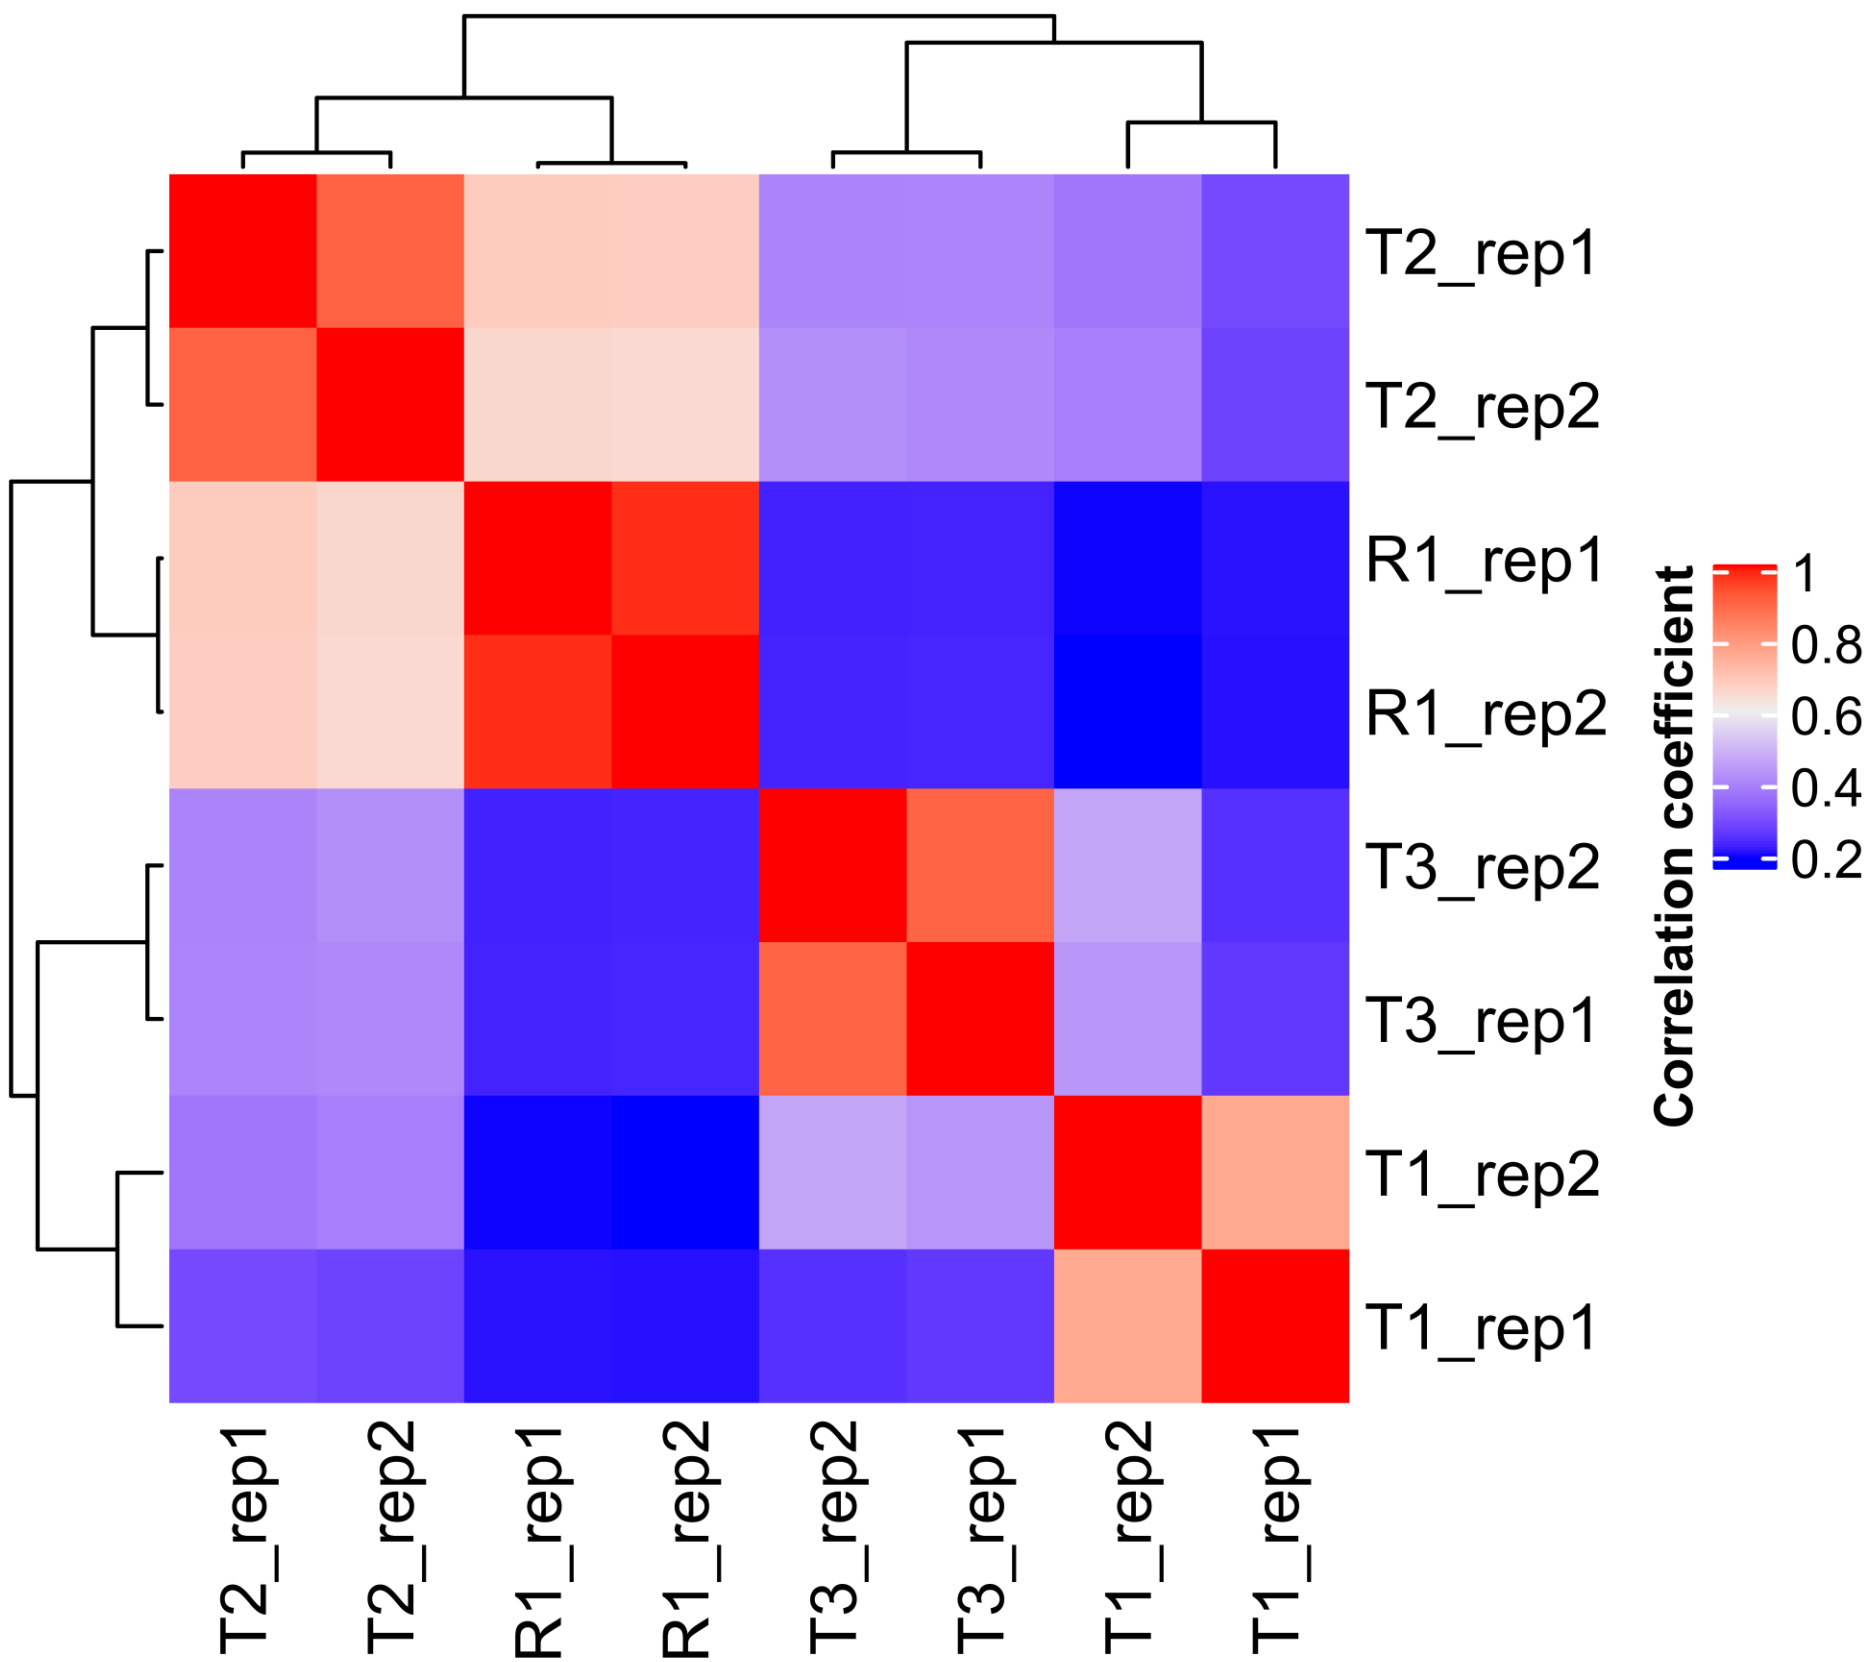

Supplement: s1 [file s1]
